# Supplementary material for: False-negative results of initial RT-PCR assays for COVID-19: A systematic review
Source: PubMed Central journal article supplement (PMC7728293; doi:10.1371/journal.pone.0242958), 2020-12-10
Supplement: pone.0242958.s002.pdf [file pone.0242958.s002.pdf]

## S2 File. SEARCH STRATEGIES

|                |                                                                                                                                                                                                                                                                                                                                                                                                                                                                                                                                                                                                                                                                                                                                                                                                                                                                                                                                                                                                                                                                                                                                                                                                                                                                                                                                                                           |
|----------------|---------------------------------------------------------------------------------------------------------------------------------------------------------------------------------------------------------------------------------------------------------------------------------------------------------------------------------------------------------------------------------------------------------------------------------------------------------------------------------------------------------------------------------------------------------------------------------------------------------------------------------------------------------------------------------------------------------------------------------------------------------------------------------------------------------------------------------------------------------------------------------------------------------------------------------------------------------------------------------------------------------------------------------------------------------------------------------------------------------------------------------------------------------------------------------------------------------------------------------------------------------------------------------------------------------------------------------------------------------------------------|
| MEDLINE-PUBMED | <p>#14 Add Search (((("Wuhan coronavirus\" [Supplementary Concept] OR \"COVID-19\" OR \"2019 ncov\"[tiab] OR ((\"novel coronavirus\"[tiab] OR \"new coronavirus\"[tiab]) AND (wuhan[tiab] OR 2019[tiab])) OR 2019-nCoV[All Fields] OR (wuhan[tiab] AND coronavirus[tiab]))) AND ((((((\"Polymerase Chain Reaction\"[Mesh]) OR \"Real-Time Polymerase Chain Reaction\"[Mesh]) OR Real-Time Polymerase Chain Reaction) OR real time pcr) OR PCR [tiab]) OR RT-PCR kit*[tiab]) OR RT-PCR assay [tiab])</p> <p>#13 Add Search ((((((\"Polymerase Chain Reaction\"[Mesh]) OR \"Real-Time Polymerase Chain Reaction\"[Mesh]) OR Real-Time Polymerase Chain Reaction) OR real time pcr) OR PCR [tiab]) OR RT-PCR kit*[tiab]) OR RT-PCR assay [tiab]</p> <p>#12 Add Search RT-PCR assay [tiab]</p> <p>#11 Add Search RT-PCR kit*[tiab]</p> <p>#10 Add Search PCR [tiab]</p> <p>#8 Add Search real time pcr</p> <p>#7 Add Search Real-Time Polymerase Chain Reaction</p> <p>#6 Add Search \"Real-Time Polymerase Chain Reaction\"[Mesh]</p> <p>#5 Add Search \"Polymerase Chain Reaction\"[Mesh]</p> <p>#3 Add Search ((\"Wuhan coronavirus\" [Supplementary Concept] OR \"COVID-19\" OR \"2019 ncov\"[tiab] OR ((\"novel coronavirus\"[tiab] OR \"new coronavirus\"[tiab]) AND (wuhan[tiab] OR 2019[tiab])) OR 2019-nCoV[All Fields] OR (wuhan[tiab] AND coronavirus[tiab])))</p> |
| EMBASE         | <ol style="list-style-type: none"> <li>1 Wuhan coronavirus.mp.</li> <li>2 COVID-19.ti,ab.</li> <li>3 2019 ncov.ti,ab.</li> <li>4 novel coronavirus.ti,ab.</li> <li>5 new coronavirus.ti,ab.</li> <li>6 (wuhan or \"2019\").ti,ab.</li> <li>7 2019-nCoV.af.</li> <li>8 (wuhan and coronavirus).ti,ab.</li> <li>9 or/1-8</li> <li>10 RNA test.mp.</li> <li>11 Real-Time Polymerase Chain Reaction/</li> <li>12 real time PCR.ti,ab.</li> <li>13 nucleic acid amplification test*.ti,ab.</li> <li>14 RT-PCR kit*.ti,ab.</li> <li>15 rRT-PCR.ti,ab.</li> <li>16 or/10-15</li> <li>17 9 and 16</li> <li>18 limit 17 to last year</li> </ol>                                                                                                                                                                                                                                                                                                                                                                                                                                                                                                                                                                                                                                                                                                                                    |
| LILACS         | <p>tw:((tw:((tw:(wuhan coronavirus)) OR (tw:(covid-19)) OR (tw:(2019 ncov)) OR (tw:(novel coronavirus)) OR (tw:(new coronavirus)) OR (tw:(wuhan OR \"2019\")) OR (tw:(wuhan AND coronavirus)))) AND (tw:((tw:(rna test)) OR (tw:(real-time polymerase chain reaction)) OR (tw:(real time pcr)) OR (tw:(nucleic acid amplification test*)) OR (tw:(rt-pcr kit*)) OR (tw:(rrt-pcr)))) AND ( db:(\"LILACS\" OR \"PAHOIRIS\" OR \"BINACIS\" OR \"IBECS\"))</p>                                                                                                                                                                                                                                                                                                                                                                                                                                                                                                                                                                                                                                                                                                                                                                                                                                                                                                                |
