# Supplementary material for: False-negative results of initial RT-PCR assays for COVID-19: A systematic review
Source: PLoS One. 2020 Dec 10;15(12):e0242958. doi: 10.1371/journal.pone.0242958 (PMC7728293; doi:10.1371/journal.pone.0242958)
Supplement: S1 File — (PDF) [file pone.0242958.s001.pdf]

**S1 File. PICO question/ eligibility criteria**

|                    | <b>Include</b>                                                                                                                                                                                                                                                               | <b>Exclude</b>                                                                                                                                                                                                                                                                                                                                                                                                                                                                                                                                                           |
|--------------------|------------------------------------------------------------------------------------------------------------------------------------------------------------------------------------------------------------------------------------------------------------------------------|--------------------------------------------------------------------------------------------------------------------------------------------------------------------------------------------------------------------------------------------------------------------------------------------------------------------------------------------------------------------------------------------------------------------------------------------------------------------------------------------------------------------------------------------------------------------------|
| Population         | <p>Patients under suspicion of infection by clinical or epidemiological criteria at initial testing (first healthcare encounter, initial ED attendance)</p> <ul style="list-style-type: none"> <li>• Due to clinical suspicious</li> <li>• Due to contact tracing</li> </ul> | <ul style="list-style-type: none"> <li>• Populations assessed for discharge or at different setting to initial testing</li> <li>• Population screening</li> <li>• spiked or artificially contrived samples</li> <li>• Less or equal to 10 confirmed cases</li> <li>• Special populations: cancer patients, multiple sclerosis, pregnant women, diabetes patients, gynaecological cancer, HIV, surgical patients (pre-operative screening)</li> </ul>                                                                                                                     |
| Index test         | <p>RT-PCR, including alternative methods for RNA extraction and other technologies (only if fulfil other criteria)</p>                                                                                                                                                       | <ul style="list-style-type: none"> <li>• Sample pooling</li> <li>• Machine learning</li> </ul>                                                                                                                                                                                                                                                                                                                                                                                                                                                                           |
| Reference standard | <ul style="list-style-type: none"> <li>• Any RT-PCR positive finding (in a short term)</li> <li>• PCR plus clinical signs/symptoms</li> <li>• Any other criteria including PCR findings</li> </ul>                                                                           | <ul style="list-style-type: none"> <li>• Serological tests</li> <li>• rapid PCR-based tests</li> <li>• Clinical guideline diagnosis (e.g. WHO or China CDC)</li> <li>• WHO classification criteria</li> <li>• Consensus of experts/clinicians</li> </ul>                                                                                                                                                                                                                                                                                                                 |
| Outcome            | <p>False- negative cases</p>                                                                                                                                                                                                                                                 | <p>Absolute numbers without a total of COVID-19 confirmed patients, insufficient/unclear numerical information</p>                                                                                                                                                                                                                                                                                                                                                                                                                                                       |
| Study design       | <p>observational studies (including accuracy studies, cohorts, and case series)</p>                                                                                                                                                                                          | <ul style="list-style-type: none"> <li>• Comparative studies between types of specimens focus on concordance</li> <li>• Comparison of alternative methods for extraction of RNA (e.g. RT-LAMP or CRISPr technology), rapid PCR-based tests, point-of-care or near patient antigen or PCR based tests</li> <li>• Studies reporting only analytical sensitivity (i.e. limits of detection) or analytical specificity (e.g. cross-reactivity), also validation/development of novel assays</li> <li>• Mathematical modelling</li> <li>• Proof of concept studies</li> </ul> |
