# Supplementary material for: False-negative results of initial RT-PCR assays for COVID-19: A systematic review
Source: PLoS One. 2020 Dec 10;15(12):e0242958. doi: 10.1371/journal.pone.0242958 (PMC7728293; doi:10.1371/journal.pone.0242958)
Supplement: S4 File — (PDF) [file pone.0242958.s004.pdf]

# S4 File. JBI case series tool- quality assessment of included studies

| Author          | 1                            | 2                                                        | 3                                                                                | 4                                     | 5                                  | 6                                             | 7                                 | 8a                                                                | 8b                 | 9                                          | 10                                  | 11a                                                       | 11b                                                       |
|-----------------|------------------------------|----------------------------------------------------------|----------------------------------------------------------------------------------|---------------------------------------|------------------------------------|-----------------------------------------------|-----------------------------------|-------------------------------------------------------------------|--------------------|--------------------------------------------|-------------------------------------|-----------------------------------------------------------|-----------------------------------------------------------|
|                 | Clear criteria for inclusion | SARS-CoV-2 measurement reliable way for all participants | Were valid methods used for identification of the condition for all participants | Consecutive inclusion of participants | Complete inclusion of participants | Reporting of the demographics of participants | Reporting of clinical information | Were the outcomes or follow up results of cases clearly reported? | Follow-up adequate | Reporting of the aetiological demographics | Numerator and denominator available | Study population adequate sample of the source population | Study population adequate sample of the target population |
| Ai T 2020       | Yes                          | Yes                                                      | Yes                                                                              | Unclear                               | Unclear                            | Yes                                           | Yes                               | Yes                                                               | Yes                | Yes                                        | Yes                                 | Yes                                                       | No                                                        |
| Albert 2020     | Yes                          | Yes                                                      | Yes                                                                              | Unclear                               | Yes                                | No                                            | Yes                               | Yes                                                               | Yes                | Yes                                        | Yes                                 | Yes                                                       | Yes                                                       |
| Bernheim A 2020 | Yes                          | Yes                                                      | Yes                                                                              | Unclear                               | Yes                                | Yes                                           | Yes                               | Yes                                                               | Yes                | Yes                                        | Yes                                 | Yes                                                       | No                                                        |
| Besutti 2020    | Yes                          | Yes                                                      | Yes                                                                              | Yes                                   | Yes                                | Yes                                           | Yes                               | Yes                                                               | Yes                | Yes                                        | Yes                                 | Yes                                                       | No                                                        |
| Chen D 2020     | Yes                          | Yes                                                      | Yes                                                                              | Unclear                               | Unclear                            | Yes                                           | Yes                               | Yes                                                               | Yes                | Yes                                        | Yes                                 | Yes                                                       | No                                                        |
| Chen HJ 2020    | Yes                          | Yes                                                      | Yes                                                                              | Unclear                               | Yes                                | Yes                                           | Yes                               | Unclear                                                           | Yes                | Yes                                        | Yes                                 | Yes                                                       | No                                                        |
| Chen ZH 2020    | Yes                          | Yes                                                      | Yes                                                                              | Yes                                   | Yes                                | Yes                                           | Yes                               | Yes                                                               | Yes                | Yes                                        | Yes                                 | Yes                                                       | No                                                        |
| Cinkooglu 2020  | Yes                          | Yes                                                      | Yes                                                                              | Yes                                   | Yes                                | Yes                                           | Yes                               | Yes                                                               | Yes                | Yes                                        | Yes                                 | Yes                                                       | No                                                        |
| Dai H 2020 2020 | Yes                          | Yes                                                      | Yes                                                                              | Yes                                   | Yes                                | Yes                                           | Yes                               | Yes                                                               | Unclear            | Yes                                        | Yes                                 | Yes                                                       | No                                                        |
| Duan X 2020     | Yes                          | Yes                                                      | Yes                                                                              | Yes                                   | Yes                                | Yes                                           | Yes                               | Yes                                                               | Yes                | Yes                                        | Yes                                 | Yes                                                       | No                                                        |
| Fang Y 2020     | Yes                          | Yes                                                      | Yes                                                                              | Yes                                   | Yes                                | Yes                                           | Yes                               | Yes                                                               | Yes                | Yes                                        | Yes                                 | Yes                                                       | No                                                        |
| Fechner 2020    | Yes                          | Yes                                                      | Yes                                                                              | Yes                                   | Unclear                            | No                                            | Yes                               | Yes                                                               | Yes                | Yes                                        | Yes                                 | Yes                                                       | No                                                        |
| Gietema 2020    | Yes                          | Yes                                                      | Yes                                                                              | Yes                                   | Yes                                | Yes                                           | Yes                               | Yes                                                               | Yes                | Yes                                        | Yes                                 | Yes                                                       | No                                                        |
| He JL 2020      | Yes                          | Yes                                                      | Yes                                                                              | Yes                                   | Yes                                | Yes                                           | Yes                               | Yes                                                               | Yes                | Yes                                        | Yes                                 | Yes                                                       | No                                                        |
| Lan 2020        | Yes                          | Yes                                                      | Yes                                                                              | Yes                                   | Yes                                | Yes                                           | Yes                               | Yes                                                               | Yes                | Yes                                        | Yes                                 | Yes                                                       | No                                                        |
| Lee TH 2020     | Yes                          | Yes                                                      | Yes                                                                              | Yes                                   | Yes                                | No                                            | Yes                               | Yes                                                               | Yes                | Yes                                        | Yes                                 | Yes                                                       | Yes                                                       |
| Li Y 2020       | Yes                          | Yes                                                      | Yes                                                                              | Yes                                   | Yes                                | Yes                                           | Yes                               | Yes                                                               | Yes                | Yes                                        | Yes                                 | Yes                                                       | No                                                        |
| Long C          | Yes                          | Yes                                                      | Yes                                                                              | No                                    | No                                 | Yes                                           | Yes                               | Yes                                                               | Yes                | Yes                                        | Yes                                 | Yes                                                       | No                                                        |
| Long DR 2020    | Yes                          | Yes                                                      | Yes                                                                              | Yes                                   | Yes                                | Yes                                           | Yes                               | Yes                                                               | Yes                | Yes                                        | Yes                                 | Yes                                                       | No                                                        |
| Ma H 2020       | Yes                          | Yes                                                      | Yes                                                                              | Yes                                   | Yes                                | Yes                                           | Yes                               | Yes                                                               | Unclear            | Yes                                        | Yes                                 | Yes                                                       | No                                                        |
| Richardson 2020 | Yes                          | Yes                                                      | Yes                                                                              | Yes                                   | Unclear                            | Yes                                           | Yes                               | Yes                                                               | Yes                | Yes                                        | Yes                                 | Yes                                                       | Yes                                                       |
| Shen N 2020     | Yes                          | Yes                                                      | Yes                                                                              | Yes                                   | Yes                                | Yes                                           | Yes                               | Yes                                                               | Yes                | Yes                                        | Yes                                 | Yes                                                       | No                                                        |
| Wang P 2020     | Yes                          | Yes                                                      | Yes                                                                              | Yes                                   | Yes                                | Yes                                           | Yes                               | Yes                                                               | Yes                | Yes                                        | Yes                                 | Yes                                                       | No                                                        |
| Wen Z 2020      | Yes                          | Yes                                                      | Yes                                                                              | Unclear                               | Yes                                | Yes                                           | Yes                               | Yes                                                               | Unclear            | Yes                                        | Yes                                 | Yes                                                       | No                                                        |
| Wong HYF 2020   | Yes                          | Yes                                                      | Yes                                                                              | Unclear                               | Yes                                | Yes                                           | Yes                               | Yes                                                               | Yes                | Yes                                        | Yes                                 | Yes                                                       | No                                                        |
| Wu J 2020       | Yes                          | Yes                                                      | Yes                                                                              | Yes                                   | Yes                                | Yes                                           | Yes                               | Yes                                                               | Yes                | Yes                                        | Yes                                 | Yes                                                       | Yes                                                       |
| Xie X 2020      | Yes                          | Yes                                                      | Yes                                                                              | Unclear                               | Yes                                | No                                            | Yes                               | Yes                                                               | Yes                | Yes                                        | Yes                                 | Yes                                                       | No                                                        |
| Young BE 2020   | Yes                          | Yes                                                      | Yes                                                                              | Yes                                   | Yes                                | Yes                                           | Yes                               | Yes                                                               | Yes                | Yes                                        | Yes                                 | Yes                                                       | No                                                        |
| Zhang H 2020    | Yes                          | Yes                                                      | Yes                                                                              | Yes                                   | Yes                                | Yes                                           | Yes                               | Yes                                                               | Yes                | Yes                                        | Yes                                 | Yes                                                       | No                                                        |
| Zhang JJ 2020   | Yes                          | Yes                                                      | Yes                                                                              | Unclear                               | Yes                                | Yes                                           | Yes                               | Yes                                                               | Yes                | Yes                                        | Yes                                 | Yes                                                       | No                                                        |
| Zhao JJ         | Yes                          | Yes                                                      | Yes                                                                              | Unclear                               | Yes                                | Yes                                           | Yes                               | Yes                                                               | Yes                | Yes                                        | Yes                                 | Yes                                                       | No                                                        |
| Zhifeng J 2020  | Yes                          | Yes                                                      | Yes                                                                              | Unclear                               | Yes                                | Yes                                           | Yes                               | Yes                                                               | Yes                | Yes                                        | Yes                                 | Yes                                                       | No                                                        |
| Zhou H 2020     | Yes                          | Yes                                                      | Yes                                                                              | Yes                                   | Yes                                | Yes                                           | No                                | Yes                                                               | Yes                | Yes                                        | Yes                                 | Yes                                                       | No                                                        |
| Zhou S 2020b    | Yes                          | Yes                                                      | Yes                                                                              | Unclear                               | Unclear                            | Yes                                           | Yes                               | Yes                                                               | Yes                | Yes                                        | Yes                                 | Yes                                                       | No                                                        |
